# Supplementary material for: Prognostic Role of Sonographic Decongestion in Patients with Acute Heart Failure with Reduced and Preserved Ejection Fraction: A Multicentre Study
Source: MDPI journal article supplement (doi:10.3390/jcm12030773), 2023-01-18
Supplement: s1 [file s1]

**Supplemental Table S1.** Univariate predictors of the primary end-point (cardiovascular death and re-hospitalization for heart failure).

| Parameter                                      | Univariate analysis HR (95% CI) | p-value     |
|------------------------------------------------|---------------------------------|-------------|
| <b>Demographics</b>                            |                                 |             |
| Age, years                                     | 0.99 (0.95 – 1.03)              | 0.5         |
| Female gender                                  | 1.06 (0.95 – 1.24)              | 0.2         |
| BSA (m <sup>2</sup> )                          | 0.31 (0.15 -1.62)               | 0.6         |
| BMI (kg/m <sup>2</sup> )                       | 0.94 (0.79 – 1.11)              | 0.4         |
| Family history of CVD                          | 0.89 (0.20 – 4.01)              | 0.8         |
| Diabetes mellitus                              | 2.65 (0.87 – 8.07)              | 0.09        |
| Arterial hypertension                          | 0.37 (0.12 – 1.13)              | 0.08        |
| Dyslipidaemia                                  | 2.61 (0.88 – 7.72)              | 0.08        |
| CAD                                            | 2.04 (0.69 – 6.05)              | 0.2         |
| Prior MI                                       | 2.17 (0.73 – 6.43)              | 0.1         |
| Prior coronary revascularization               | 0.72 (0.09 – 5.59)              | 0.7         |
| Atrial fibrillation                            | 0.58 (0.39 – 1.18)              | 0.07        |
| <b>In-hospital evaluation</b>                  |                                 |             |
| Creatinine (mg/dL) at admission                | 1.51 (0.89 – 2.55)              | 0.1         |
| eGFR (mL/min/1.73m <sup>2</sup> ) at admission | 0.99 (0.98 –1.01)               | 0.3         |
| NYHA class III-IV at admission                 | 1.37 (0.50 – 3.77)              | 0.5         |
| NT-proBNP (pg/mL) at admission                 | 1.00 (1.00 – 1.01)              | <b>0.01</b> |
| NT-proBNP (pg/mL) at discharge*                | 1.00 (0.99 – 1.01)              | 0.5         |
| In-hospital diuresis (L)                       | 1.00 (0.99 – 1.01)              | 0.8         |
| Intravenous furosemide (mg)                    | 0.99 (0.99 – 1.01)              | 0.9         |
| Intravenous inotropes                          | 1.09 (0.27 – 4.33)              | 0.9         |
| Admission CXR                                  |                                 |             |
| Vascular congestion                            | 1.47 (0.29 – 1.12)              | 0.7         |
| Interstitial edema                             | 2.3 (0.30 – 1.78)               | 0.4         |
| Alveolar edema                                 | 3.27 (0.89 – 1.19)              | 0.07        |
| Unilateral pleural effusion                    | 2.72 (0.87 – 5.16)              | 0.08        |
| Bilateral pleural effusion                     | 0.80 (0.48 – 1.49)              | 0.8         |
| <b>Home medications</b>                        |                                 |             |
| Beta-blockers                                  | 2.63 (0.54 – 12.71)             | 0.2         |
| ACE inhibitor/ARB                              | 0.73 (0.15 – 3.49)              | 0.7         |
| MRA                                            | 1.01 (0.25 – 3.99)              | 0.9         |
| Furosemide                                     | 3.02 (0.35 – 11.71)             | 0.3         |
| Furosemide dose (mg/die)                       | 1.01 (0.99 – 1.01)              | 0.3         |
| Thiazide / thiazide-like diuretics             | 2.29 (0.27 – 9.55)              | 0.4         |
| Digoxin                                        | 0.66 (0.14 – 3.19)              | 0.6         |
| Calcium-channel blockers                       | 0.71 (0.09 – 5.65)              | 0.7         |
| Amiodarone                                     | 0.95 (0.77 – 1.39)              | 0.3         |
| Statins                                        | 0.50 (0.06 – 3.99)              | 0.5         |
| Oral anticoagulants                            | 0.80 (0.21 – 2.98)              | 0.7         |
| Antiplatelet drugs                             | 0.78 (0.09 – 6.19)              | 0.8         |
| <b>Echocardiography at admission</b>           |                                 |             |
| EDV (mL/m <sup>2</sup> )                       | 0.97 (0.93 – 1.02)              | 0.2         |
| ESV (mL/m <sup>2</sup> )                       | 1.04 (0.99 – 1.10)              | 0.07        |
| LV ejection fraction (%)                       | 1.03 (0.99 – 1.08)              | 0.09        |

|                                    |                    |                   |
|------------------------------------|--------------------|-------------------|
| LVMi (g/m <sup>2</sup> )           | 0.99 (0.97 – 1.02) | 0.8               |
| Relative wall thickness            | 3.92 (0.87 – 9.04) | 0.2               |
| LAVi (mL/m <sup>2</sup> )          | 0.97 (0.88 – 1.07) | 0.6               |
| Anteroposterior LAD (mm)           | 0.97 (0.91 – 1.04) | 0.4               |
| Mitral regurgitation               | 5.19 (1.80 – 14.9) | <b>0.002</b>      |
| Mitral stenosis                    | 2.37 (0.65 – 8.61) | 0.2               |
| Aortic regurgitation               | 2.67 (0.73 – 9.74) | 0.1               |
| Aortic stenosis                    | 1.45 (0.25 – 11.3) | 0.4               |
| E-wave (cm/s)                      | 1.01 (0.99 – 1.03) | 0.1               |
| A-wave (cm/s)                      | 1.05 (0.97 – 1.15) | 0.2               |
| E/A ratio                          | 0.73 (0.4 – 3.59)  | 0.7               |
| Restrictive pattern <sup>§</sup>   | 0.57 (0.40 – 3.24) | 0.6               |
| RA minor axis (cm/m <sup>2</sup> ) | 1.08 (0.99 – 1.16) | 0.06              |
| RVOT PLAX diameter (mm)            | 1.03 (0.94 – 1.13) | 0.5               |
| TAPSE (mm)                         | 0.91 (0.79 – 1.03) | 0.1               |
| PASP (mmHg)                        | 1.05 (0.91 – 1.23) | 0.7               |
| IVC expiratory diameter (mm)       | 1.15 (1.07 – 1.24) | <b>&lt;0.0001</b> |
| Dilated IVC without collapse       | 1.25 (1.12 – 1.69) | <b>0.01</b>       |
| <b>Lung ultrasound</b>             |                    |                   |
| B-lines at admission               | 1.01 (1.01 – 1.02) | <b>0.03</b>       |
| B-lines at discharge               | 1.04 (1.02 – 1.06) | <b>&lt;0.0001</b> |
| ΔB-lines%                          | 1.01 (1.01 – 1.01) | <b>0.02</b>       |
| Decongestion rate (ΔB-lines/die)   | 1.05 (0.95 – 1.15) | 0.3               |

\*available in 148/208 patients (71%).

See legend in Table 1 and 2.

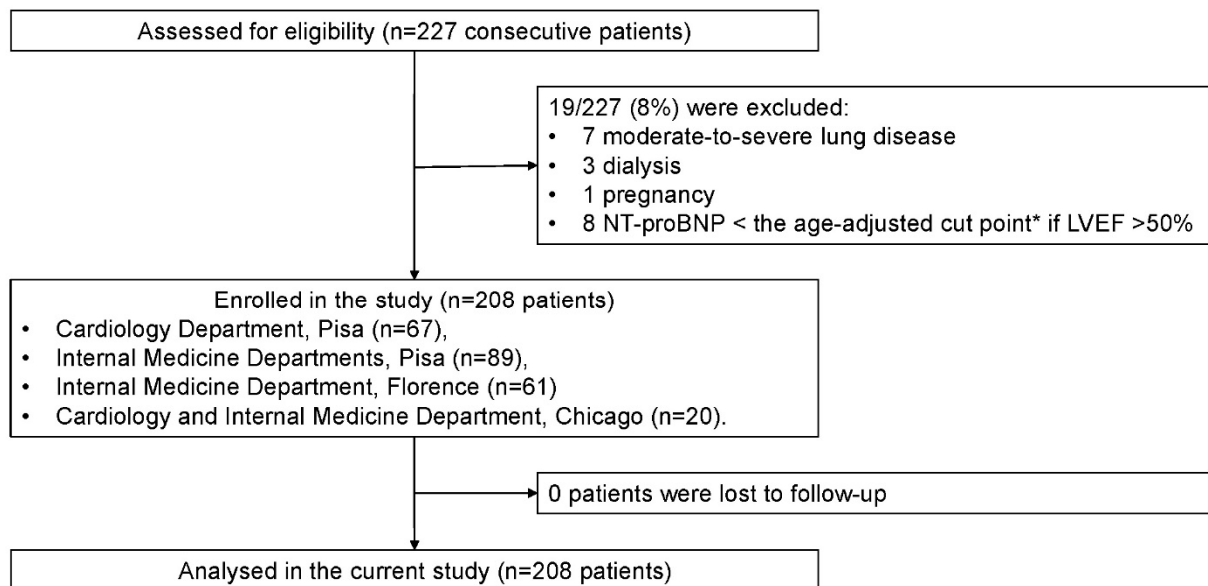

Supplemental Figure S1. CONSORT flow diagram. LVEF: left ventricle ejection fraction; NT-proBNP: N-terminal prohormone of brain natriuretic peptide.

\* NT-proBNP  $\leq 900$  pg/mL ages 50-75,  $\leq 1,800$  pg/mL over age 75(14).

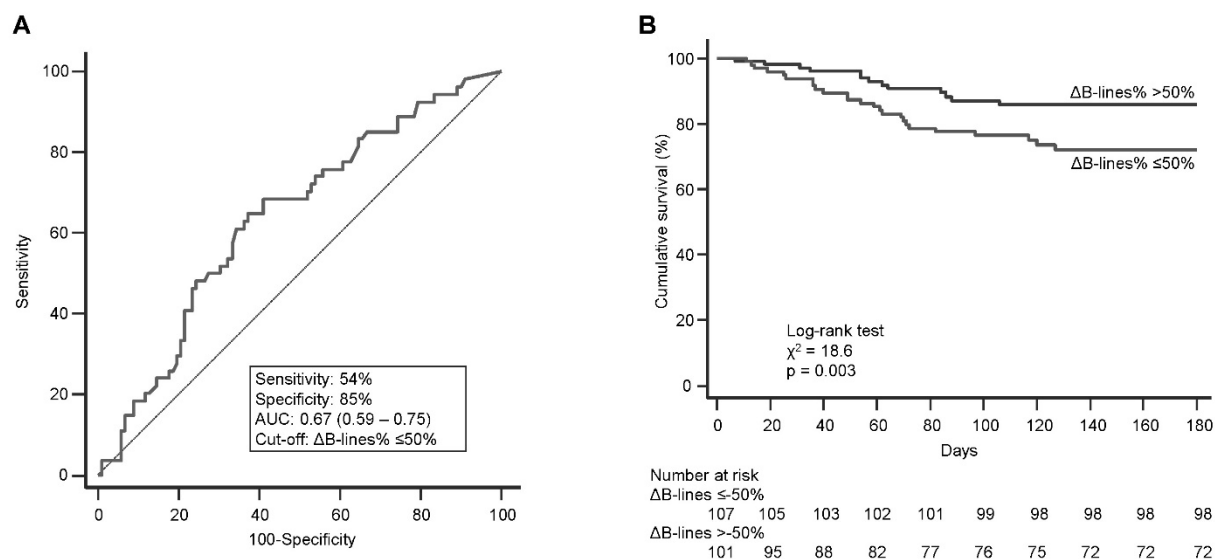

Supplemental Figure S2. **A) ROC analysis of  $\Delta B\text{-lines}\%$  in predicting the composite endpoint (cardiovascular death and rehospitalization for heart failure).** ROC curve analysis describing the performance of  $\Delta B\text{-lines}\%$  to identify the primary endpoint (rehospitalization for heart failure and cardiovascular death). The AUC and 95% confidence interval are shown, as well as the sensitivity and specificity at the cut-off identified based on the highest Youden index.  $\Delta B\text{-lines}\% = (\text{B-lines at discharge} - \text{B-lines at admission}) / \text{B-lines at admission} \%$ . AUC: area under the curve; ROC: receiver operating characteristic.

**B) Kaplan-Meier survival curves stratified according to the ROC-derived cut-off.** The curves illustrate a significant difference in cumulative survival, with patients having  $\Delta B\text{-lines}\% \leq 50\%$  experiencing a worse outcome than those with  $\Delta B\text{-lines}\% > 50\%$ . Numbers of patients at risk are shown below the survival curves.
